# Supplementary material
Source: PubMed Central journal article supplement (PMC3238030)
Supplement: aud0017-0148-s01.pdf [file aud0017-0148-s01.pdf]

## SUPPLEMENTARY TABLE: FGF-VEGF Gene Expression During OM

### 1. FGF Genes Associated with Angiogenesis and Regulated During OM

| Time:                      | 0h      | 3h          | 6h          | 24h         | 2d       | 3d          | 5d      | 7d      |
|----------------------------|---------|-------------|-------------|-------------|----------|-------------|---------|---------|
| <i>Fgf1</i> (1441042_at)   |         |             |             |             |          |             |         |         |
| Fold Exp.                  | 1.0     | 0.3         | 0.2         | 0.5         | 0.3      | 0.2         | 0.4     | 0.4     |
| Range                      | 0.7-1.3 | 0.3-0.3     | 0.2-0.3     | 0.4-0.6     | 0.2-0.4  | 0.2-0.2     | 0.3-0.5 | 0.3-0.7 |
| P-Value                    | 0.90    | 0.04        | 0.11        | 0.13        | 0.18     | <b>0.00</b> | 0.17    | 0.34    |
| <i>Fgf2</i> (1449826_a_at) |         |             |             |             |          |             |         |         |
| Fold Exp.                  | 1.00    | 1.79        | 2.52        | 1.46        | 1.49     | 1.75        | 0.84    | 1.97    |
| Range                      | 1.0-1.0 | 1.7-1.9     | 2.4-2.7     | 0.9-2.4     | 1.0-2.3  | 1.6-2.0     | 0.8-1.0 | 1.8-2.2 |
| P-Value                    | 0.99    | 0.05        | <b>0.05</b> | 0.58        | 0.53     | 0.13        | 0.30    | 0.11    |
| <i>Fgf7</i> (1422243_at)   |         |             |             |             |          |             |         |         |
| Fold Exp.                  | 1.00    | 1.30        | 1.19        | 2.94        | 1.92     | 1.89        | 1.65    | 1.95    |
| Range                      | 1.0-1.1 | 1.3-1.3     | 1.2-1.2     | 2.9-3.0     | 1.8-2.1  | 1.8-2.0     | 1.5-1.8 | 1.5-2.6 |
| P-Value                    | 0.97    | <b>0.02</b> | 0.11        | <b>0.02</b> | 0.09     | 0.07        | 0.13    | 0.25    |
| <i>Fgf8</i> (1451882_a_at) |         |             |             |             |          |             |         |         |
| Fold Exp.                  | 1.0     | 3.8         | 0.9         | 0.9         | 1.4      | 2.6         | 2.9     | 3.5     |
| Range                      | 1.0-1.1 | 3.6-4.1     | 0.7-1.2     | 0.7-1.2     | 1.28-1.5 | 1.9-3.4     | 1.6-5.3 | 2.0-6.2 |
| P-Value                    | 0.97    | <b>0.03</b> | 0.85        | 0.82        | 0.16     | 0.19        | 0.33    | 0.27    |
| <i>Fgf9</i> (1420795_at)   |         |             |             |             |          |             |         |         |
| Fold Exp.                  | 1.0     | 0.6         | 0.7         | 0.7         | 1.2      | 1.2         | 1.1     | 1.1     |
| Range                      | 1.0-1.0 | 0.6-0.7)    | 0.6-0.9     | 0.7-0.8     | 1.1-1.3  | 1.2-1.2     | 1.1-1.1 | 1.0-1.3 |
| P-Value                    | 0.99    | <b>0.02</b> | 0.32        | 0.21        | 0.26     | <b>0.01</b> | 0.26    | 0.37    |

### 2. FGF Receptor Genes Regulated During OM

| Time:                       | 0h      | 3h      | 6h          | 24h         | 2d          | 3d          | 5d          | 7d      |
|-----------------------------|---------|---------|-------------|-------------|-------------|-------------|-------------|---------|
| <i>Fgfr1</i> (1424050_s_at) |         |         |             |             |             |             |             |         |
| Fold Exp.                   | 1.0     | 1.2     | 1.0         | 0.5         | 0.4         | 0.5         | 0.6         | 0.5     |
| Range                       | 0.8-1.2 | 1.0-1.4 | 1.0-1.0     | 0.5-0.6     | 0.4-0.5     | 0.4-0.6     | 0.6-0.7     | 0.4-0.6 |
| P-Value                     | 0.94    | 0.47    | 0.19        | 0.11        | <b>0.04</b> | 0.14        | 0.07        | 0.13    |
| <i>Fgfr2</i> (1443211_at)   |         |         |             |             |             |             |             |         |
| Fold Exp.                   | 0.9     | 1.8     | 2.3         | 0.2         | 1.6         | 0.6         | 1.9         | 1.5     |
| Range                       | 0.7-1.3 | 1.5-2.1 | 2.2-2.4     | 0.1-0.8     | 1.2-2.1     | 0.5-0.8     | 1.8-2.0     | 1.4-1.5 |
| P-Value                     | 0.89    | 0.18    | <b>0.03</b> | 0.45        | 0.38        | 0.29        | <b>0.02</b> | 0.03    |
| <i>Fgfr3</i> (1425796_a_at) |         |         |             |             |             |             |             |         |
| Fold Exp.                   | 0.5     | 0.9     | 0.8         | 1.9         | 2.1         | 1.5         | 2.7         | 2.2     |
| Range                       | 0.1-1.9 | 0.8-0.9 | 0.8-1.0     | 1.5-2.4     | 1.8-2.4     | 1.5-1.5     | 2.6-2.8     | 2.0-2.4 |
| P-Value                     | 0.68    | 0.23    | 0.31        | 0.23        | 0.12        | <b>0.02</b> | <b>0.03</b> | 0.08    |
| <i>Fgfr4</i> (1427845_at)   |         |         |             |             |             |             |             |         |
| Fold Exp.                   | 0.9     | 0.2     | 0.8         | 0.3         | 0.2         | 0.3         | 0.5         | 0.3     |
| Range                       | 0.5-1.5 | 0.1-0.3 | 0.7-1.0     | 0.3-0.3     | 0.2-0.2     | 0.2-0.4     | 0.3-1.0     | 0.1-0.7 |
| P-Value                     | 0.83    | 0.16    | 0.45        | <b>0.05</b> | <b>0.04</b> | 0.22        | 0.50        | 0.40    |

### 3. All VEGF Genes

| Time:                       | 0h      | 3h      | 6h      | 24h         | 2d      | 3d      | 5d      | 7d      |
|-----------------------------|---------|---------|---------|-------------|---------|---------|---------|---------|
| <i>Vegfa</i> (1451959_a_at) |         |         |         |             |         |         |         |         |
| Fold Exp.                   | 0.7     | 3.0     | 2.6     | 2.6         | 1.7     | 1.3     | 1.3     | 0.9     |
| Range                       | 0.3-1.7 | 2.5-3.5 | 2.1-3.4 | 2.4-2.8     | 1.5-2.0 | 0.9-2.0 | 1.2-1.3 | 0.5-1.8 |
| P-Value                     | 0.76    | 0.10    | 0.16    | <b>0.06</b> | 0.18    | 0.59    | 0.12    | 0.93    |

### 3. All VEGF Genes (continued)

| Time:                       | 0h      | 3h          | 6h          | 24h     | 2d      | 3d      | 5d          | 7d      |
|-----------------------------|---------|-------------|-------------|---------|---------|---------|-------------|---------|
| <i>Vegfb</i> (1451803_a_at) |         |             |             |         |         |         |             |         |
| Fold Exp.                   | 1.0     | 0.3         | 0.2         | 1.8     | 1.5     | 0.2     | 0.4         | 0.2     |
| Range                       | 0.7-1.3 | 0.3-0.3     | 0.1-0.2     | 1.6-1.9 | 1.1-2.0 | 0.1-0.2 | 0.2-0.7     | 0.2-0.3 |
| P-Value                     | 0.91    | <b>0.03</b> | 0.10        | 0.07    | 0.38    | 0.12    | 0.39        | 0.10    |
| <i>Vegfc</i> (1439766_x_at) |         |             |             |         |         |         |             |         |
| Fold Exp.                   | 1.0     | 0.7         | 0.4         | 1.0     | 1.7     | 1.2     | 1.3         | 1.2     |
| Range                       | 0.8-1.2 | 0.6-0.8     | 0.3-0.6     | 1.0-1.0 | 1.3-2.1 | 0.9-1.7 | 1.3-1.3     | 0.8-1.8 |
| P-Value                     | 0.94    | 0.26        | 0.20        | 0.72    | 0.28    | 0.67    | <b>0.03</b> | 0.72    |
| <i>Vegfd</i> (1438954_x_at) |         |             |             |         |         |         |             |         |
| Fold Exp.                   | 0.9     | 0.7         | 0.5         | 0.7     | 0.8     | 0.7     | 0.5         | 0.4     |
| Range                       | 0.5-1.5 | 0.5-1.0     | 0.5-0.5     | 0.6-0.8 | 0.5-1.1 | 0.5-1.0 | 0.4-0.5     | 0.3-0.6 |
| P-Value                     | 0.85    | 0.51        | <b>0.02</b> | 0.20    | 0.58    | 0.46    | 0.08        | 0.23    |
| <i>Pgf</i> (1418471_at)     |         |             |             |         |         |         |             |         |
| Fold Exp.                   | 0.9     | 5.2         | 3.3         | 2.4     | 2.1     | 2.2     | 0.8         | 0.9     |
| Range                       | 0.5-1.5 | 4.8-5.6     | 2.6-4.1     | 2.1-2.8 | 1.9-2.2 | 1.1-4.6 | 0.7-1.0     | 0.8-1.2 |
| P-Value                     | 0.84    | <b>0.03</b> | 0.12        | 0.11    | 0.06    | 0.47    | 0.42        | 0.86    |

### 4. All VEGF Receptor Genes

| Time:                        | 0h       | 3h      | 6h          | 24h         | 2d          | 3d          | 5d      | 7d          |
|------------------------------|----------|---------|-------------|-------------|-------------|-------------|---------|-------------|
| <i>Vegfr1</i> (1454037_a_at) |          |         |             |             |             |             |         |             |
| Fold Exp.                    | 1.0      | 2.2     | 2.9         | 2.4         | 1.5         | 0.9         | 1.2     | 1.0         |
| Range                        | 1.0-1.0  | 2.0-2.4 | 2.8-3.0     | 2.1-2.7     | 1.3-1.8     | 0.9-0.9     | 1.1-1.2 | 0.7-1.4     |
| P-Value                      | 0.99     | 0.06    | <b>0.02</b> | 0.08        | 0.21        | <b>0.00</b> | 0.08    | 1.00        |
| <i>Vegfr2</i> (1449379_at)   |          |         |             |             |             |             |         |             |
| Fold Exp.                    | 1.0      | 0.9     | 0.8         | 1.2         | 0.8         | 0.8         | 0.9     | 0.8         |
| Range                        | 0.9-1.1  | 0.8-1.1 | 0.6-1.0     | 1.1-1.2     | 0.7-0.9     | 0.7-0.9     | 0.8-0.9 | 0.7-0.9     |
| P-Value                      | 0.95     | 0.76    | 0.54        | 0.19        | 0.38        | 0.26        | 0.25    | 0.31        |
| <i>Vegfr3</i> (1421442_at)   |          |         |             |             |             |             |         |             |
| Fold Exp.                    | 1.0      | 1.3     | 1.0         | 1.1         | 1.2         | 0.4         | 0.9     | 0.6         |
| Range                        | 0.9-1.1  | 1.2-1.4 | 0.6-1.6     | 1.1-1.1     | 1.0-1.4     | 0.3-0.5     | 0.7-1.0 | 0.5-0.7     |
| P-Value                      | 0.96     | 0.23    | 0.97        | 0.19        | 0.42        | 0.13        | 0.55    | 0.13        |
| <i>Nrp1</i> (1448944_at)     |          |         |             |             |             |             |         |             |
| Fold Exp.                    | 0.99     | 0.66    | 0.55        | 1.04        | 1.62        | 1.98        | 1.18    | 1.04        |
| Range                        | 0.8-1.2) | 0.5-0.9 | 0.5-0.6     | 1.0-1.1     | 1.6-1.6     | 1.3-3.1     | 1.0-1.4 | (0.8-1.4    |
| P-Value                      | 0.95     | 0.41    | <b>0.05</b> | 0.60        | <b>0.01</b> | 0.36        | 0.56    | 0.92        |
| <i>Nrp2</i> (1426528_at)     |          |         |             |             |             |             |         |             |
| Fold Exp.                    | 1.00     | 1.34    | 1.05        | 0.73        | 0.85        | 0.92        | 0.77    | 0.81        |
| Range                        | 1.0-1.0  | 1.2-1.5 | 1.0-1.1     | 0.7-0.7     | 0.8-0.9     | 0.8-1.0     | 0.7-0.8 | 0.8-0.8     |
| P-Value                      | 0.99     | 0.19    | 0.08        | <b>0.02</b> | 0.31        | 0.33        | 0.18    | <b>0.02</b> |
